# Supplementary material for: DNA sequence and analysis of human chromosome 18
Source: Springer Nature journal article supplement (doi:10.1038/nature03983), 2005-09-21

**Chromosome 18**  
**Nusbaum et al.**  
**Figure Suppl. 1**

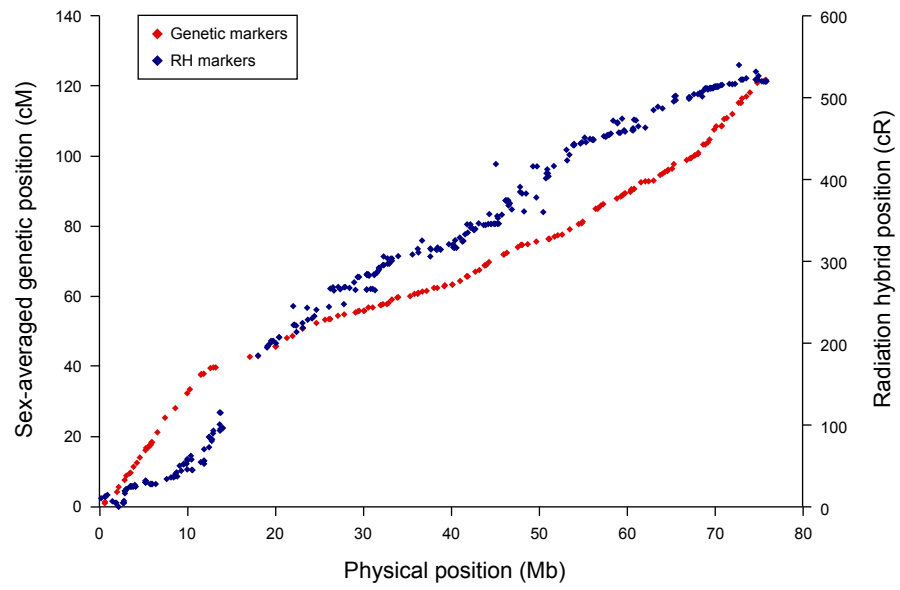

Chromosome 18  
Nusbaum et al.  
Figure Suppl. 2

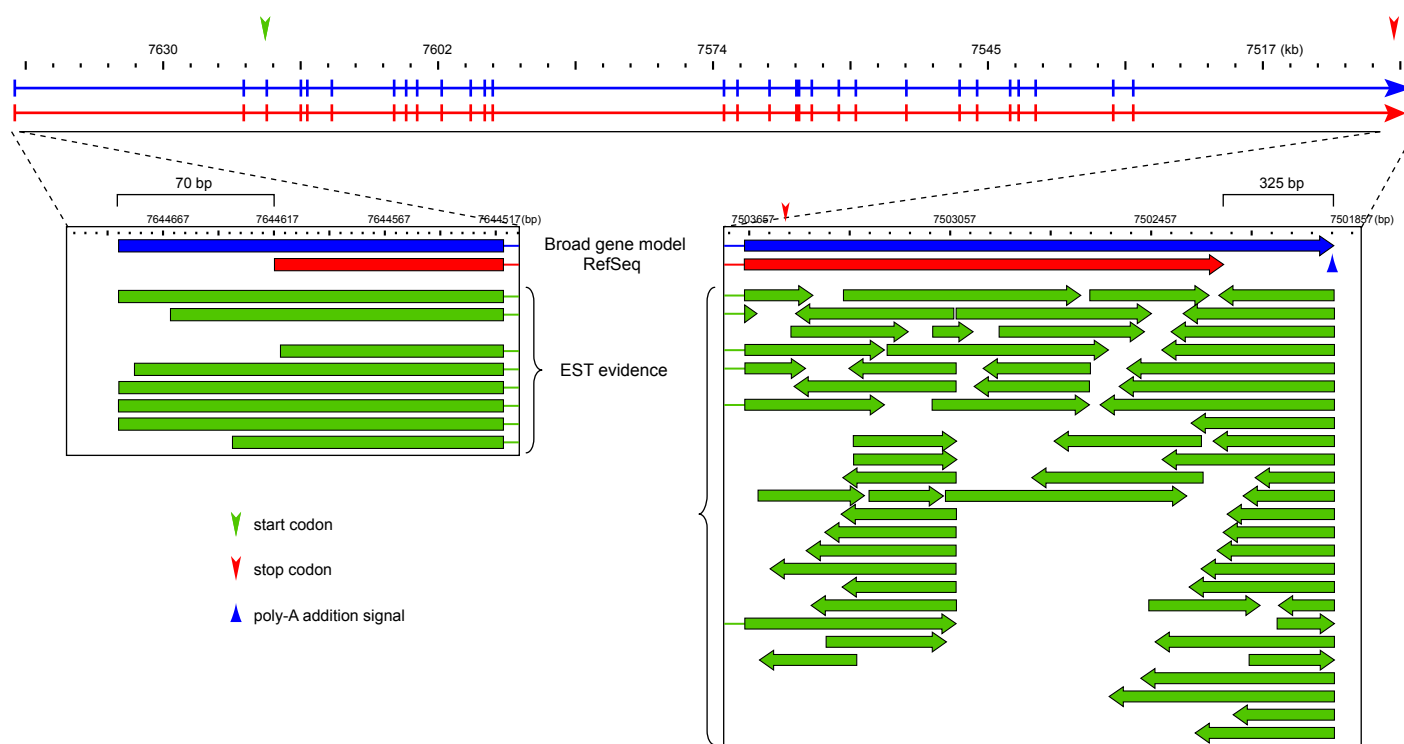

Chromosome 18  
Nusbaum et al.  
Figure Suppl. 3

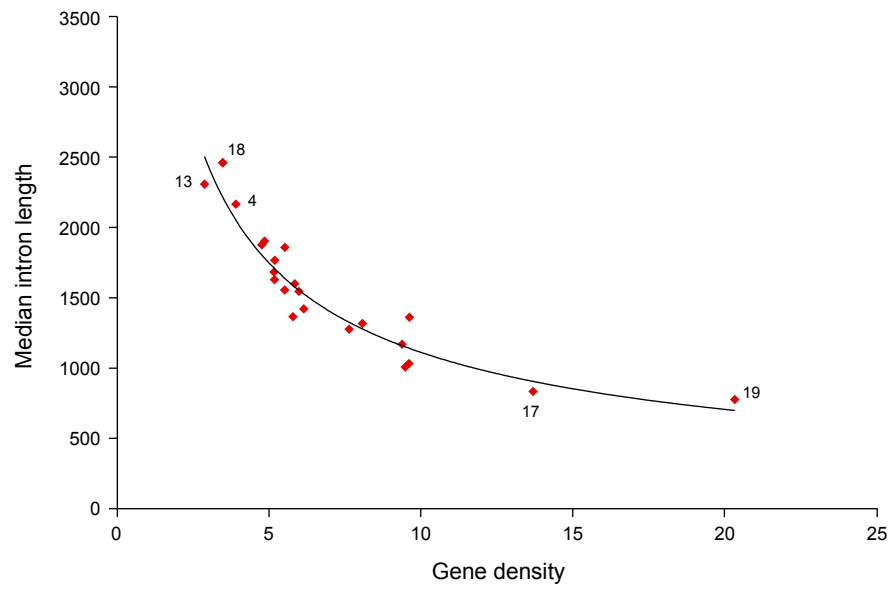

Chromosome 18  
Nusbaum et al.  
Figure Suppl. 4

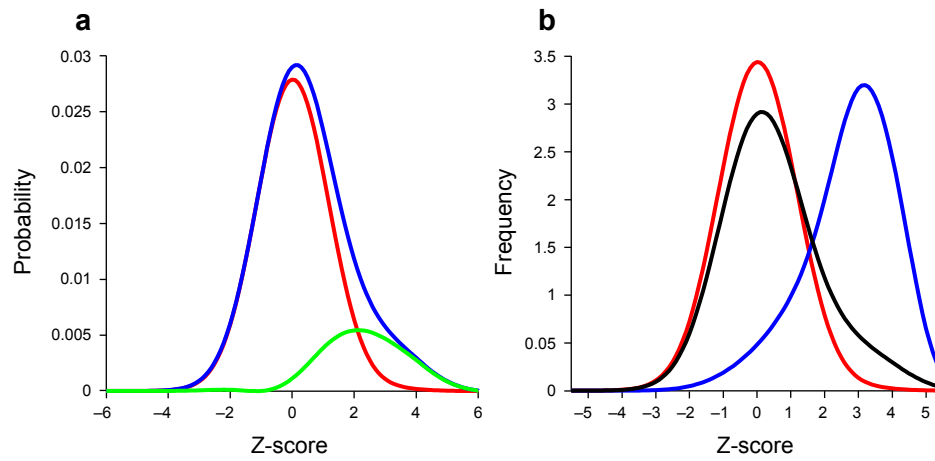

Supplement: nature03983-s3.pdf [file nature03983-s3.pdf]
